# Supplementary material
Source: PubMed Central journal article supplement (PMC2669779)
Supplement: NIHMS78740-supplement-Suplementary_Data.pdf [file NIHMS78740-supplement-Suplementary_Data.pdf]

## Supplementary information

### Supplementary Materials & Methods

*Generation of  $\alpha 4$  integrin S<sup>988</sup>A knock-in mice:* A genomic fragment encompassing exons 25-28 of mouse  $\alpha 4$  integrin was cloned into Bluescript plasmid. A single Ser-to-Ala point mutation was created at position 988, and a *neo* cassette flanked by loxP sequences was introduced between exon 27 and exon 28 for drug selection. The targeting construct was electroporated into embryonic stem cells and drug-resistant clones were screened by Southern blotting for recombination between the targeting construct and the  $\alpha 4$  genomic locus. Positive clones were injected into blastocysts, which were then implanted into pseudo-pregnant female mice. Chimeric mice (agouti) were crossed with mice of the same genetic background as the blastocysts. Progeny from these crosses were screened by genomic PCR for heterozygous S<sup>988</sup>A mutation. Heterozygous S<sup>988</sup>A progeny were crossed to obtain homozygous littermates.

*Generation of  $\alpha 4$  fl/fl (null) pulmonary endothelial cells:*  $\alpha 4$  fl/fl cells were treated with soluble Cre recombinase to remove exon 28 and the polyadenylation tail from the  $\alpha 4$  gene locus. Elimination of  $\alpha 4$  protein expression was confirmed by FACScan using R1/2 antibodies to mouse  $\alpha 4$  integrins (Abcam, Cambridge, MA).

## **Supplementary Figures**

**Supplementary Figure 1:** Jurkat cells and human microvascular endothelial (HME) cells were surface-labeled with mouse IgG (dotted lines) or HP2/1 mouse anti-human  $\alpha 4$  integrin and subjected to FACS analysis.

**Supplementary Figure 2:** HMECs were pre-incubated for 15 min with blocking antibodies against the indicated integrins and seeded onto surfaces coated with the cell-binding fragment of fibronectin (911), the  $\alpha 4$ -binding fragment of fibronectin (CS-1), collagen, or poly-L-Lysine for 60 min. Cells were fixed and labeled with crystal violet to indicate relative numbers of adherent cells.

**Supplementary Figure 3:** Cells in Figure 5B were suspended with trypsin and labeled with R1/2 antibodies to mouse  $\alpha 4$  integrin and analyzed by FACS.

**Supplementary Figure 4:** Primary endothelial cell cultures derived from mice expressing wild type  $\alpha 4$  or  $\alpha 4$  harboring a Ser→Ala mutation at position 988 were seeded on CS-1, scratch wounded and subjected to shear stress for 5 min. Sheared cells were fixed and stained with PS $\alpha 4$ . White arrows indicate enhanced plasma membrane  $\alpha 4$  phosphorylation.

# Supplementary Figure 1

## Jurkat

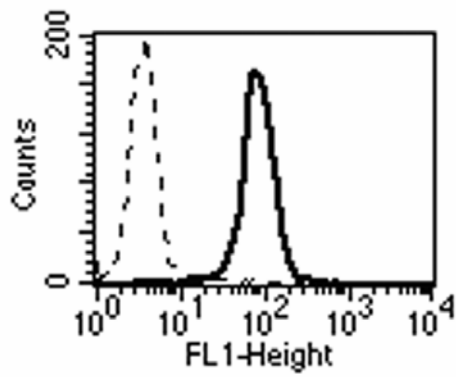

## HMEC

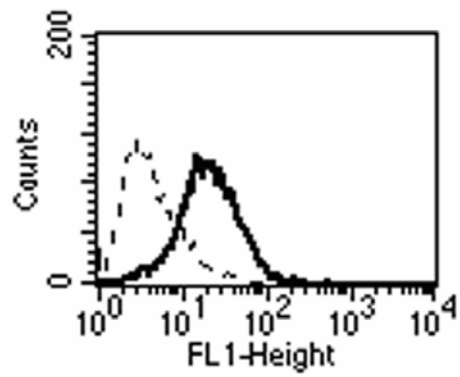

## Supplementary Figure 2

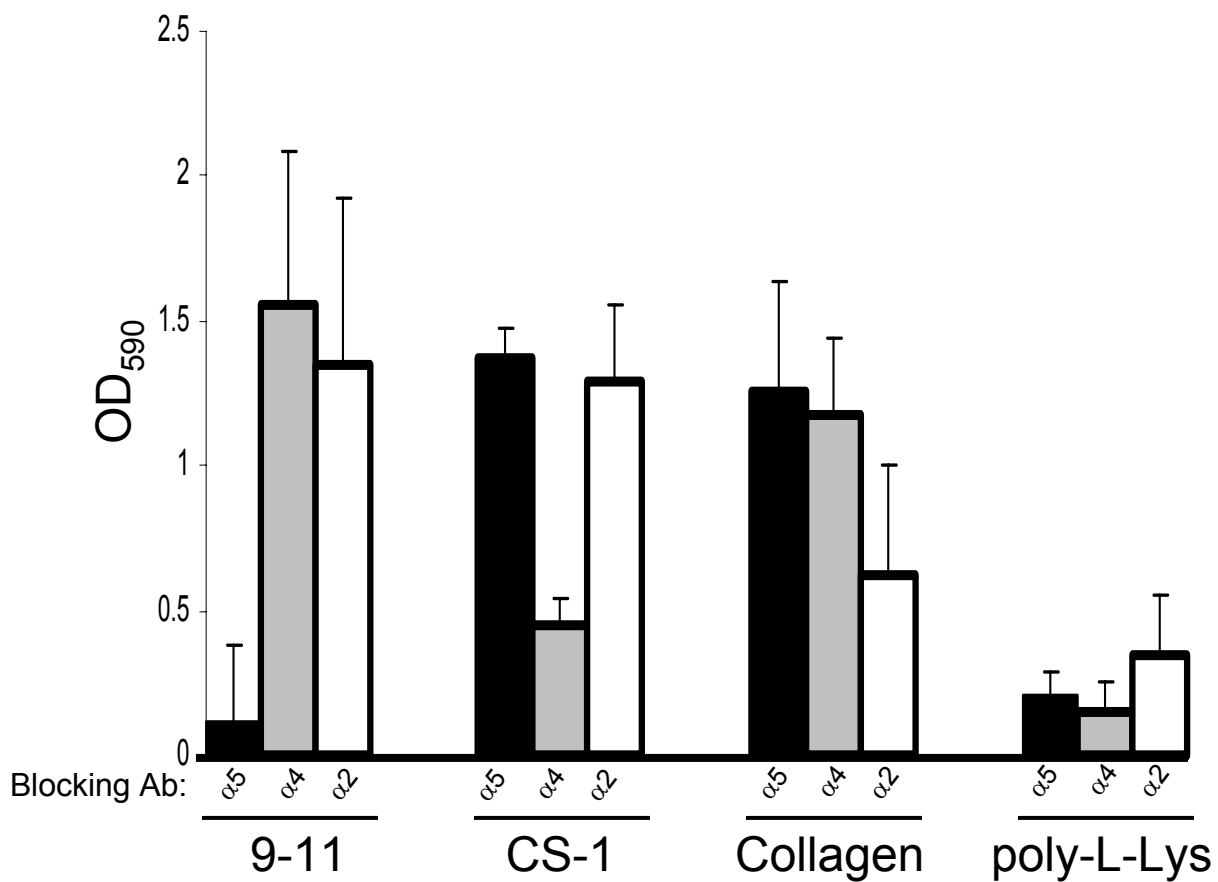

# Supplementary Figure 3

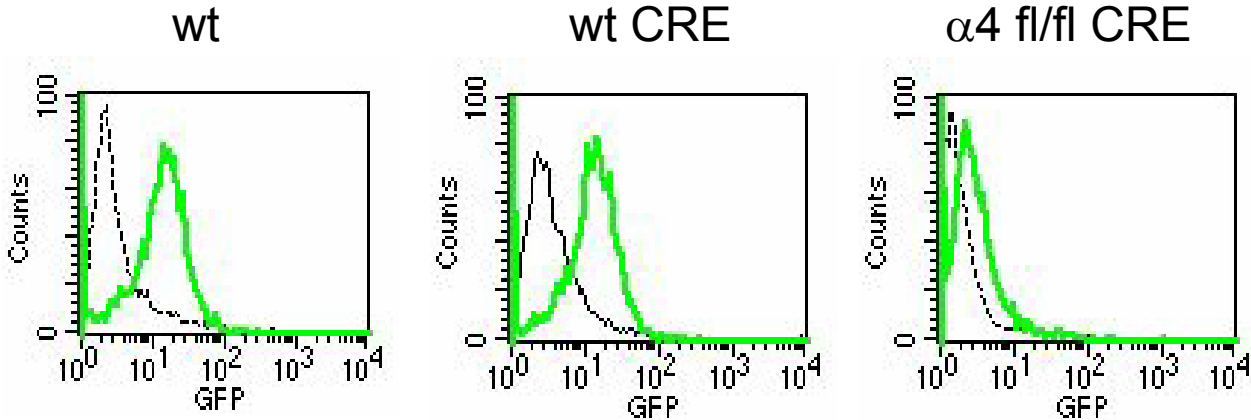

# Supplementary Figure 4

Flow

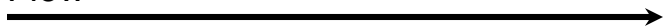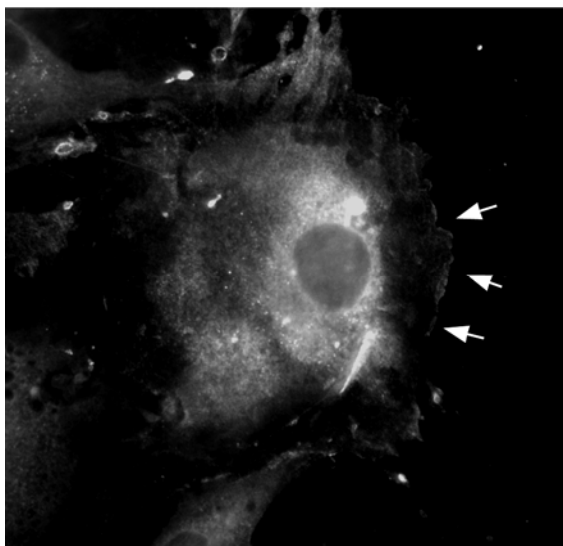

wt

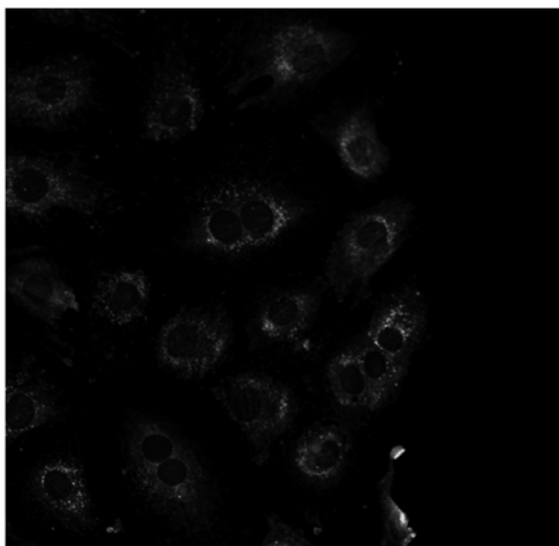

S988A
